# Supplementary material for: Synthesis of calcium phosphate microcapsules using yeast-based biotemplate
Source: Royal Society of Chemistry journal article supplement (doi:10.1039/c1jm13905c), 2011-11-07
Supplement: c1jm13905c.pdf [file c1jm13905c.pdf]

## Supplementary Information

### Thermoanalysis

Fig. 1 shows the corresponding DTA-TG pattern of the CP particles before calcinations. A sharp endothermic peak at 84.6°C corresponded to a thermo weight-loss of about 8.5%. This change indicated the evaporation of deionic water. A weak endothermic peak and several broad exothermic peaks from 158.9°C to 648.9°C were observed, which corresponded to a rapid drop of about 55.6% in the weight loss curve. The front endothermic peak occurs at 236.7°C, which could be ascribed to the decomposition of polyelectrolytes (PDADMAC/PAA) and the organic components of YCs. The latter indicated the combustion of residual organic matrix. There was almost no change in TG curve above 650°C, which suggested the complete removal of biotemplates. Another broad peak detected between 650°C and 800°C without weight loss could be regarded as the range of crystalline phase change. The 64.1% weight loss starting from 31°C to 650°C was due to the elimination of the biotemplate and no further weight loss was observed for temperature increased above 650°C.

Information provided by DTA-TG analysis was used for the optimization of burning protocol.

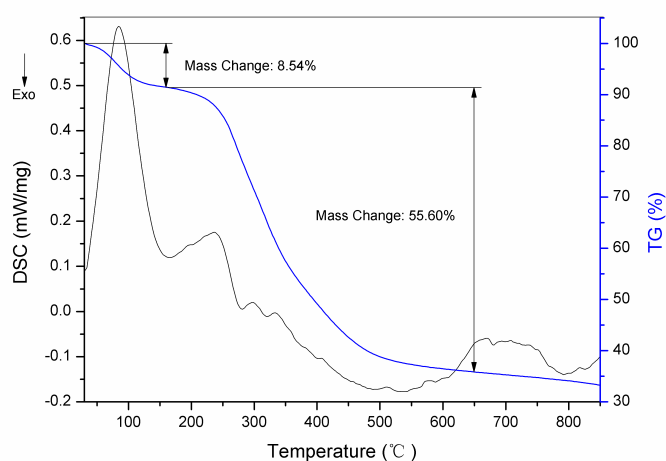

Fig. 1 The DTA-TG pattern of sample CP30.

### Elemental analysis

Fig. 2 shows the EDS surface scan curves of CP from different sintering temperatures. Before sintering, the sample contained seven elements: C, O, P, Ca, N, and S (in curve A). C, N and S are derived from the biotemplate, while P and Ca belong to CP. Curve B indicates that N disappears and the peak intensity of C and S weaken, which implies the ratio of biotemplates in that sample declined after calcinations. Curve C indicates that S also disappears and the peak intensity of C weaken further, while the peak intensity of Ca, P, and O increase, which implies that the biotemplate was removed completely and the pure CP remained. The existed weak peak of C could be the sign of  $\text{CO}_3^{2-}$  remaining in the CP layer.

The EDS data could further confirm the effect of sintering for the biotemplate removal and the qualitative analysis of the products.

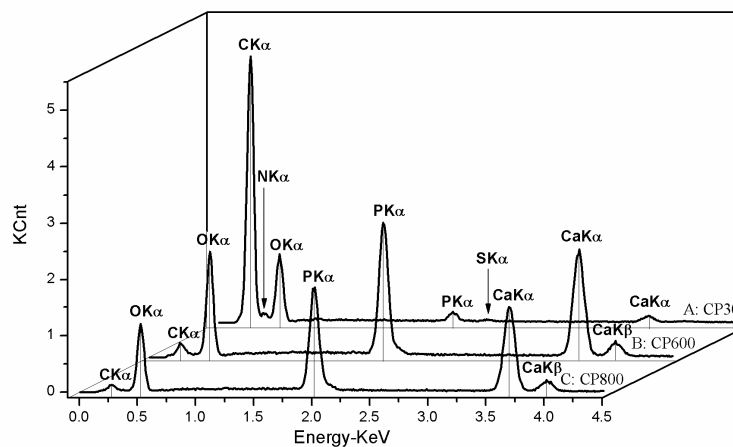

Fig. 2 Representative EDS surface scan from synthetic products.

### Note

TG-DSC was carried out on a NETZSCH STA 449C thermal analyzer (heating speed  $10^{\circ}\text{C min}^{-1}$ , nitrogen atmosphere). Energy Dispersive Spectrometer (EDS, SHIMADZU EPMA-1600, Japan) was used to make qualitative and quantitative analysis of the elements distribution of micro-areas of the products (Acc.V=15.0 kV, B.C=7.5nA).
